# Supplementary material for: Rates of knee arthroplasty in anterior cruciate ligament reconstructed patients: a longitudinal cohort study of 111,212 procedures over 20 years
Source: PubMed Central journal article supplement (PMC6844427; doi:10.1080/17453674.2019.1639360), 2019-07-10
Supplement: IORT_A_1639360_SM5203.pdf [file IORT_A_1639360_SM5203.pdf]

## Supplementary data

Table 1. Demographics of ACLr cohort and proportion of patients with at least 5, 10, and 15 years' follow-up undergoing subsequent TKA

| Factor                                    | All index procedures |        | 5-year outcome |                  | 10-year outcome |       |                  | 15-year outcome |       |                  |
|-------------------------------------------|----------------------|--------|----------------|------------------|-----------------|-------|------------------|-----------------|-------|------------------|
|                                           | n (%)                | n      | n TKA          | % (95% CI)       | n               | n TKA | % (95% CI)       | n               | n TKA | % (95% CI)       |
| Total                                     | 111,212 (100)        | 46,402 | 212            | 0.46 (0.40–0.52) | 14,292          | 139   | 0.97 (0.82–1.2)  | 3,726           | 66    | 1.8 (1.4–2.3)    |
| Sex                                       |                      |        |                |                  |                 |       |                  |                 |       |                  |
| Male                                      | 85,905 (77.2)        | 36,620 | 127            | 0.35 (0.29–0.41) | 11,672          | 91    | 0.78 (0.63–0.96) | 3,118           | 51    | 1.6 (1.2–2.2)    |
| Female                                    | 25,307 (22.8)        | 9,782  | 85             | 0.87 (0.69–1.07) | 2,620           | 48    | 1.8 (1.4–2.4)    | 608             | 15    | 2.5 (1.4–4.0)    |
| Age group (years)                         |                      |        |                |                  |                 |       |                  |                 |       |                  |
| < 20                                      | 16,156 (14.5)        | –      | –              | –                | –               | –     | –                | –               | –     | –                |
| 20–29                                     | 47,901 (43.1)        | 22,503 | 6              | 0.03 (0.01–0.06) | 6,414           | 8     | 0.12 (0.05–0.25) | 1,730           | 6     | 0.35 (0.13–0.75) |
| 30–39                                     | 28,715 (25.8)        | 14,846 | 44             | 0.30 (0.22–0.40) | 5,456           | 45    | 0.82 (0.60–1.1)  | 1,533           | 33    | 2.2 (1.5–3.0)    |
| 40–49                                     | 14,690 (13.2)        | 7,427  | 99             | 1.3 (1.1–1.6)    | 2,028           | 54    | 2.7 (2.0–3.5)    | 403             | 22    | 5.5 (3.5–8.2)    |
| 50–59                                     | 3,235 (2.9)          | 1,394  | 41             | 2.9 (2.1–4.0)    | 338             | 24    | 7.1 (4.6–10.4)   | 60              | 5     | 8.3 (2.8–18.4)   |
| ≥ 60                                      | 515 (0.46)           | 232    | 22             | 9.5 (6.0–14.0)   | 56              | 8     | 14.3 (6.4–26.2)  | –               | –     | –                |
| Charlson comorbidity index                |                      |        |                |                  |                 |       |                  |                 |       |                  |
| 0                                         | 100,680 (90.5)       | 43,005 | 184            | 0.43 (0.37–0.49) | 13,588          | 128   | 0.94 (0.79–1.12) | 3,726           | 66    | 1.8 (1.4–2.3)    |
| 1–15                                      | 10,484 (9.4)         | 3,397  | 28             | 0.82 (0.55–1.2)  | 704             | 11    | 1.6 (0.78–2.8)   | –               | –     | –                |
| 16–30                                     | 47 (0.04)            | –      | –              | –                | –               | –     | –                | –               | –     | –                |
| 31–50                                     | 1 (0.00)             | –      | –              | –                | –               | –     | –                | –               | –     | –                |
| Index of multiple deprivation (quintiles) |                      |        |                |                  |                 |       |                  |                 |       |                  |
| 1 = least deprived                        | 23,158 (20.8)        | 10,230 | 35             | 0.34 (0.24–0.48) | 3,196           | 26    | 0.81 (0.53–1.2)  | 909             | 15    | 1.65 (0.93–2.71) |
| 2                                         | 22,290 (20.0)        | 9,663  | 48             | 0.50 (0.37–0.66) | 2,963           | 36    | 1.2 (0.85–1.7)   | 824             | 13    | 1.58 (0.84–2.68) |
| 3                                         | 22,252 (20.0)        | 9,447  | 41             | 0.43 (0.31–0.59) | 2,947           | 25    | 0.85 (0.55–1.3)  | 744             | 16    | 2.15 (1.23–3.47) |
| 4                                         | 21,434 (19.3)        | 8,599  | 41             | 0.48 (0.34–0.65) | 2,647           | 27    | 1.02 (0.67–1.5)  | 675             | 12    | 1.78 (0.92–3.08) |
| 5 = most deprived                         | 20,233 (18.2)        | 7,524  | 45             | 0.60 (0.44–0.80) | 2,210           | 24    | 1.1 (0.70–1.6)   | 510             | 10    | 1.96 (0.94–3.58) |
| Missing                                   | 1,845                | –      | –              | –                | –               | –     | –                | –               | –     | –                |
| Rurality                                  |                      |        |                |                  |                 |       |                  |                 |       |                  |
| Urban                                     | 88,727 (79.8)        | 36,538 | 160            | 0.44 (0.37–0.51) | 11,272          | 111   | 0.98 (0.81–1.2)  | 2,945           | 58    | 1.97 (1.50–2.54) |
| Rural                                     | 21,604 (19.4)        | 9,489  | 50             | 0.53 (0.39–0.69) | 2,898           | 27    | 0.93 (0.61–1.4)  | 743             | 8     | 1.08 (0.47–2.11) |
| Missing                                   | 881                  | –      | –              | –                | –               | –     | –                | –               | –     | –                |
| Ethnicity                                 |                      |        |                |                  |                 |       |                  |                 |       |                  |
| White                                     | 92,820 (83.5)        | 42,801 | 212            | 0.50 (0.43–0.57) | 12,840          | 139   | 1.1 (0.91–1.3)   | 3,213           | 66    | 2.1 (1.6–2.6)    |
| Asian                                     | 5,353 (4.8)          | –      | –              | –                | –               | –     | –                | –               | –     | –                |
| Black                                     | 2,131 (1.9)          | –      | –              | –                | –               | –     | –                | –               | –     | –                |
| Mixed                                     | 1,401 (1.3)          | –      | –              | –                | –               | –     | –                | –               | –     | –                |
| Other                                     | 1,590 (1.4)          | –      | –              | –                | –               | –     | –                | –               | –     | –                |
| Missing                                   | 7,917 (7.1)          | –      | –              | –                | –               | –     | –                | –               | –     | –                |
| Concurrent procedures                     |                      |        |                |                  |                 |       |                  |                 |       |                  |
| Isolated ACLr                             | 76,773 (69.0)        | 35,452 | 180            | 0.51 (0.44–0.59) | 12,577          | 130   | 1.0 (0.86–1.2)   | 3,726           | 66    | 1.8 (1.4–2.3)    |
| Chondral surgery                          | 2,601 (2.3)          | 840    | 9              | 1.1 (0.49–2.0)   | –               | –     | –                | –               | –     | –                |
| Meniscal surgery <sup>a</sup>             | 31,838 (28.6)        | 10,110 | 23             | 0.23 (0.14–0.34) | 1,715           | 9     | 0.52 (0.24–0.99) | –               | –     | –                |

ACLR = anterior cruciate ligament reconstruction; CI = confidence interval; n TKA = number of total or partial knee arthroplasties.

– = suppressed due to small numbers.

<sup>a</sup> with or without concurrent chondral surgery.

## APPENDIX: OPCS procedure code list

| Procedure                     | OPCS 4.2 | OPCS 4.3 | OPCS 4.4 | OPCS 4.5 | OPCS 4.6 | OPCS 4.7 | Description                                                                           |
|-------------------------------|----------|----------|----------|----------|----------|----------|---------------------------------------------------------------------------------------|
| ACLR <sup>a</sup>             | W74.2    | W74.2    | W74.2    | W74.2    | W74.2    | W74.2    | Reconstruction of intra-articular ligament NEC                                        |
| Other ACL <sup>a, b</sup>     | W84.1    | W84.1    | W84.1    | W84.1    | W84.1    | W84.1    | Endoscopic repair of intra-articular ligament                                         |
| Other ACL <sup>a, b</sup>     | W84.2    | W84.2    | W84.2    | W84.2    | W84.2    | W84.2    | Endoscopic reattachment of intra-articular ligament                                   |
| Other ACL <sup>a, b</sup>     | W72.3    | W72.3    | W72.3    | W72.3    | W72.3    | W72.3    | Primary prosthetic replacement of intra-articular ligament                            |
| Other ACL <sup>a, b</sup>     | W72.4    | W72.4    | W72.4    | W72.4    | W72.4    | W72.4    | Prosthetic replacement of intra-articular ligament NEC                                |
| Chondral surgery <sup>a</sup> | W83.3    | W83.3    | W83.3    | W83.3    | W83.3    | W83.3    | Endoscopic shaving of articular cartilage                                             |
| Chondral surgery <sup>a</sup> | W83.8    | W83.8    | W83.4    | W83.4    | W83.4    | W83.4    | Endoscopic articular abrasion chondroplasty                                           |
| Chondral surgery <sup>a</sup> | W83.8    | W83.8    | W83.5    | W83.5    | W83.5    | W83.5    | Endoscopic articular thermal chondroplasty                                            |
| Chondral surgery <sup>a</sup> | W83.8    | W83.8    | W83.6    | W83.6    | W83.6    | W83.6    | Endoscopic excision of articular cartilage NEC                                        |
| Chondral surgery <sup>a</sup> | W83.8    | W83.8    | W83.8    | W83.8    | W83.8    | W83.8    | Other specified therapeutic endoscopic operations on other articular cartilage        |
| Chondral surgery <sup>a</sup> | W83.8    | W83.8    | W89.1    | W89.1    | W89.1    | W89.1    | Endoscopic chondroplasty NEC                                                          |
| Chondral surgery <sup>a</sup> | W83.1    | W83.1    | W83.1    | W83.1    | W83.1    | W83.1    | Endoscopic drilling of lesion of articular cartilage                                  |
| Chondral surgery <sup>a</sup> | -        | -        | W84.5    | W84.5    | W84.5    | W84.5    | Endoscopic drilling of epiphysis for repair of articular cartilage                    |
| Meniscal surgery              | W82.2    | W82.2    | W82.2    | W82.2    | W82.2    | W82.2    | Endoscopic resection of semilunar cartilage NEC                                       |
| Meniscal surgery              | W82.3    | W82.3    | W82.3    | W82.3    | W82.3    | W82.3    | Endoscopic repair of semilunar cartilage                                              |
| Meniscal surgery              | W82.1    | W82.1    | W82.1    | W82.1    | W82.1    | W82.1    | Endoscopic total excision of semilunar cartilage                                      |
| Arthroplasty <sup>a</sup>     | W43.1    | W43.1    | W43.1    | W43.1    | W43.1    | W43.1    | Primary total prosthetic replacement of joint using cement NEC                        |
| Arthroplasty <sup>a</sup>     | W44.1    | W44.1    | W44.1    | W44.1    | W44.1    | W44.1    | Primary total prosthetic replacement of joint not using cement NEC                    |
| Arthroplasty <sup>a</sup>     | W44.8    | W44.8    | W44.8    | W44.8    | W44.8    | W44.8    | Other specified total prosthetic replacement of other joint not using cement          |
| Arthroplasty <sup>a</sup>     | W44.9    | W44.9    | W44.9    | W44.9    | W44.9    | W44.9    | Unspecified total prosthetic replacement of other joint not using cement              |
| Arthroplasty <sup>a</sup>     | W45.1    | W45.1    | W45.1    | W45.1    | W45.1    | W45.1    | Primary total prosthetic replacement of joint NEC                                     |
| Arthroplasty <sup>a</sup>     | W45.8    | W45.8    | W45.8    | W45.8    | W45.8    | W45.8    | Other specified other total prosthetic replacement of other joint                     |
| Arthroplasty <sup>a</sup>     | W45.9    | W45.9    | W45.9    | W45.9    | W45.9    | W45.9    | Unspecified other total prosthetic replacement of other joint                         |
| Arthroplasty <sup>a</sup>     | W53.8    | W53.8    | W53.8    | W53.8    | W53.8    | W53.8    | Other specified prosthetic replacement of articulation of other bone not using cement |
| Arthroplasty                  | W40.1    | W40.1    | W40.1    | O18.1    | O18.1    | O18.1    | Primary hybrid prosthetic replacement of knee joint using cement                      |
| Arthroplasty                  | W40.8    | W40.8    | W40.8    | O18.8    | O18.8    | O18.8    | Other specified hybrid prosthetic replacement of knee joint using cement              |
| Arthroplasty                  | W40.9    | W40.9    | W40.9    | O18.9    | O18.9    | O18.9    | Unspecified hybrid prosthetic replacement of knee joint using cement                  |
| Arthroplasty                  | W40.1    | W40.1    | W40.1    | W40.1    | W40.1    | W40.1    | Primary total prosthetic replacement of knee joint using cement                       |
| Arthroplasty                  | W40.8    | W40.8    | W40.8    | W40.8    | W40.8    | W40.8    | Other specified total prosthetic replacement of knee joint using cement               |
| Arthroplasty                  | W40.9    | W40.9    | W40.9    | W40.9    | W40.9    | W40.9    | Unspecified total prosthetic replacement of knee joint using cement                   |
| Arthroplasty                  | W41.1    | W41.1    | W41.1    | W41.1    | W41.1    | W41.1    | Primary total prosthetic replacement of knee joint not using cement                   |
| Arthroplasty                  | W41.8    | W41.8    | W41.8    | W41.8    | W41.8    | W41.8    | Other specified total prosthetic replacement of knee joint not using cement           |
| Arthroplasty                  | W41.9    | W41.9    | W41.9    | W41.9    | W41.9    | W41.9    | Unspecified total prosthetic replacement of knee joint not using cement               |
| Arthroplasty                  | W42.1    | W42.1    | W42.1    | W42.1    | W42.1    | W42.1    | Primary total prosthetic replacement of knee joint NEC                                |
| Arthroplasty                  | W42.8    | W42.8    | W42.8    | W42.8    | W42.8    | W42.8    | Other specified other total prosthetic replacement of knee joint                      |
| Arthroplasty                  | W42.9    | W42.9    | W42.9    | W42.9    | W42.9    | W42.9    | Unspecified other total prosthetic replacement of knee joint                          |
| Arthroplasty <sup>a</sup>     | W58.1    | W58.1    | W58.1    | W58.1    | W58.1    | W58.1    | Primary resurfacing arthroplasty of joint                                             |

<sup>a</sup> Additional matched site-specific (knee) code required (Z846, Z765, Z845, Z844, Z774, or Z787)

<sup>b</sup> excluded
